# Supplementary material for: Transient Permeabilization of Living Cells: Combining Shear Flow and Acoustofluidic Trapping for the Facilitated Uptake of Molecules
Source: MDPI journal article supplement (doi:10.3390/pr9060913), 2021-05-22
Supplement: s1 [file s1]

Archive with 1 entries (1 files):
- processes-1206977-supplementary.pdf
